# Supplementary material for: Amplified Host Defense by Toll-Like Receptor-Mediated Downregulation of the Glucocorticoid-Induced Leucine Zipper (GILZ) in Macrophages
Source: PubMed Central journal article supplement (PMC6349698; doi:10.3389/fimmu.2018.03111), 2019-01-22
Supplement: Data_Sheet_1.pdf [file Data_Sheet_1.pdf]

## *Supplementary Material*

### **Amplified host defense by Toll-like receptor-mediated downregulation of the glucocorticoid-induced leucine zipper (GILZ) in macrophages**

**Jessica Hoppstädter<sup>1\*</sup>, Britta Diesel<sup>1</sup>, Rebecca Linnenberger<sup>1</sup>, Nina Hachenthal<sup>1</sup>, Sara Flamini<sup>2</sup>, Marie Minet<sup>1</sup>, Petra Leidinger<sup>3</sup>, Christina Backes<sup>4</sup>, Friedrich Grässer<sup>5</sup>, Eckart Meese<sup>3</sup>, Stefano Bruscoli<sup>2</sup>, Carlo Riccardi<sup>2</sup>, Hanno Huwer<sup>6</sup>, Alexandra K. Kiemer<sup>1</sup>**

<sup>1</sup> Pharmaceutical Biology, Department of Pharmacy, Saarland University, Saarbrücken, Germany

<sup>2</sup> Pharmacology, Department of Medicine, Perugia University, Perugia, Italy

<sup>3</sup> Human Genetics, Department of Medicine, Saarland University, Homburg, Germany

<sup>4</sup> Chair for Clinical Bioinformatics, Saarland University, Saarbrücken, Germany

<sup>5</sup> Virology, Department of Medicine, Saarland University, Homburg, Germany

<sup>6</sup> Cardiothoracic Surgery, Völklingen Heart Centre, Völklingen, Germany

**\* Correspondence:**

Jessica Hoppstädter, Ph.D.

[j.hoppstaedter@mx.uni-saarland.de](mailto:j.hoppstaedter@mx.uni-saarland.de)

## Supplementary Figures

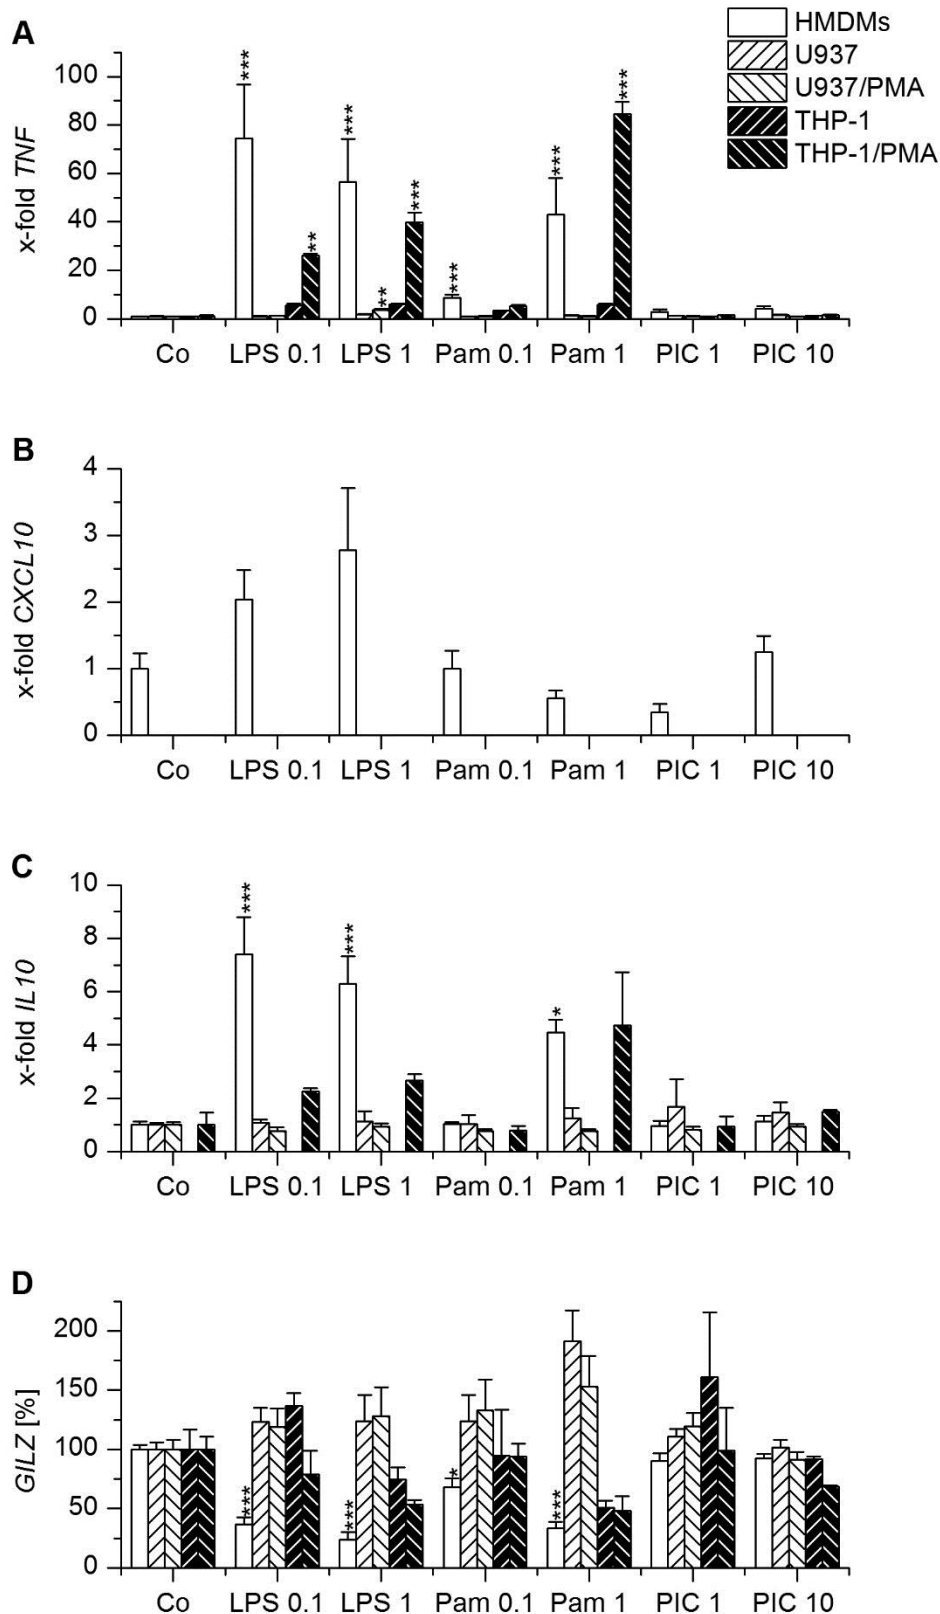

**Supplementary Figure 1.** Responsiveness of human macrophages and macrophage-like cells towards the TLR1/2 ligand Pam<sub>3</sub>CSK<sub>4</sub> and the TLR3 ligand Poly(I:C). Human monocyte-derived macrophages (HMDMs), as well as undifferentiated or PMA-differentiated U937 and THP-1 cells were left untreated (Co) or treated with LPS (0.1 or 1 μg/ml), Pam<sub>3</sub>CSK<sub>4</sub> (Pam, 0.1 and 1 μg/ml), or PIC (PIC, 1 and 10 μg/ml) for 2 h. and mRNA was quantified by qRT-PCR using *ACTB* as a housekeeping gene (n = 2-3, triplicates). \*p < 0.05, \*\*p < 0.01, \*\*\*p < 0.001 vs. Co.

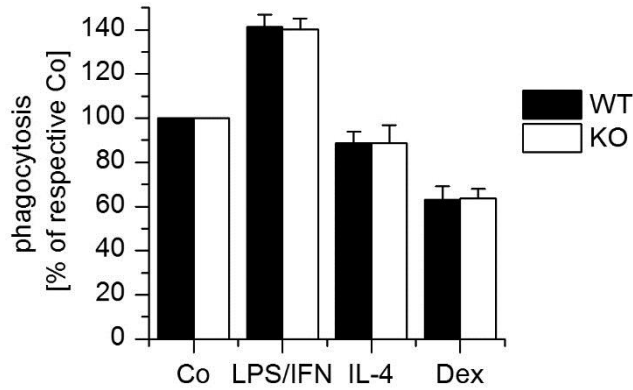

**Supplementary Figure 2.** Different treatment schemes do not alter the effect of GILZ depletion on phagocytosis. WT and GILZ KO BMMs were left untreated (Co) or treated with LPS (1  $\mu\text{g/ml}$ ) and INF- $\gamma$  (IFN, 20 ng/ml), IL-4 (20 ng/ml) or dexamethasone (Dex, 1  $\mu\text{M}$ ) for 20 h, followed by incubation with fluorescent latex particles (diameter 1.75  $\mu\text{m}$ , 50 particles per cell) for 1 h. Particle uptake was quantified by flow cytometry. The total percentage of cells with particle-associated fluorescence in LPS/IFN, IL-4, or Dex-treated cells was normalized to the respective value for cells that were not treated otherwise prior to particle exposure.

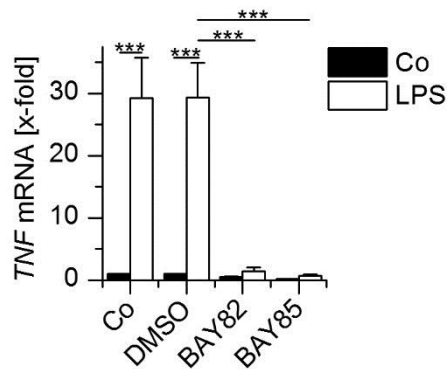

**Supplementary Figure 3.** *NF- $\kappa$ B* inhibition. After preincubation with BAY-11-7082 or BAY-11-7085 (5  $\mu\text{M}$ , 1 h), solvent (0.1% DMSO) or medium only (Co), AMs were treated with LPS (100 ng/ml) for 2 h. *TNF* mRNA expression was determined by qRT-PCR using ACTB as a housekeeping gene (n = 3, duplicates).

## Supplementary Tables

Supplementary Table 1: PCR conditions.

| Gene                  | Sequence (5'→3') forward primer          | Sequence (5'→3') reverse primer          | Probe sequence (5'FAM→3'BHQ)                | Probe [nM] | MgCl <sub>2</sub> [mM] | Annealing [°C] |
|-----------------------|------------------------------------------|------------------------------------------|---------------------------------------------|------------|------------------------|----------------|
| <i>IL6</i>            | AAT AAT<br>AAT GGA<br>AAG TGG<br>CTA TGC | AAT GCC<br>ATT TAT<br>TGG TAT<br>AAA AAC | TCC TTT GTT<br>TCA GAG CCA<br>GAT CAT TTC T | 100        | 4                      | 57             |
| <b>IL8 (CXCL8)</b>    | TGC CAG<br>TGA AAC<br>TTC AAG<br>CA      | ATT GCA<br>TCT GGC<br>AAC CCT AC         | CAG ACC CAC<br>ACA ATA CAT<br>GAA GTG TTG A | 100        | 4                      | 59             |
| <i>TNF</i>            | CTC CAC<br>CCA TGT<br>GCT CCT<br>CA      | CTC TGG<br>CAG GGG<br>CTC TTG AT         | CAC CAT CAG<br>CCG CAT CGC<br>CGT CTC       | 100        | 3                      | 60             |
| <b>GILZ (TSC22D3)</b> | TCC TGT<br>CTG AGC<br>CCT GAA<br>GAG     | AGC CAC<br>TTA CAC<br>CGC AGA<br>AC      | TCC CGA ATC<br>CCC ACA AGT<br>GCC CGA       | 100        | 4                      | 60             |
| <b>β-actin (ACTB)</b> | TGC GTG<br>ACA TTA<br>AGG AGA<br>AG      | GTC AGG<br>CAG CTC<br>GTA GCT CT         | CAC GGC TGC<br>TTC CAG CTC<br>CTC           | 60         | 4                      | 60             |
| <i>CXCL10</i>         | GAG CCT<br>ACA GCA<br>GAG GAA<br>CC      | AAG GCA<br>GCA AAT<br>CAG AAT CG         | TCC AGT CTC<br>AGC ACC ATG<br>AAT CAA A     | 60         | 4                      | 60             |
| <i>IL10</i>           | CAA CAG<br>AAG CTT<br>CCA TTC<br>CA      | AGC AGT<br>TAG GAA<br>GCC CCA AG         | AGC CTG ACC<br>ACG CTT TCT<br>AGC TGT TGA G | 100        | 4                      | 60             |
| <b>TTP (ZFP36)</b>    | TCG CCA<br>CCC CAA<br>ATA CAA            | TTC GCT<br>AGG GTT<br>GTG GAT            | no probe                                    | N/A        | N/A                    | 60             |

**Supplementary Table 2: Primers used to clone miRNA overexpression vectors.**

| <b>miRNA</b>  | <b>forward primer ( plus EcoR1 site)</b>      | <b>reverse primer (plus BamH1 or BglIII site)</b> |
|---------------|-----------------------------------------------|---------------------------------------------------|
| hsa-miR-18a   | GC GAA TTC ATG GGA AGC CAA<br>GTT GGG CTT TAA | GA GGA TCC CAC CTA TAT ACT<br>TGC TTG GCT         |
| hsa-miR-19a   | GC GAA TTC ATG ATC CAA TAA<br>TTC AAG CCA AGC | GA GGA TCC GCA GAT TCT ACA<br>TCG ACA CAA         |
| hsa-miR-19b   | GC GAA TTC ATG TAG CTG TAG<br>AAC TCC AGC TTC | GA GGA TCC GGG TTT GAG TTT<br>CCC TTA CTT         |
| hsa-miR-34b   | GC GAA TTC ATG TAC GCG TGT<br>TGT GCG CTG CGA | GA GGA TCC AAC CGC GGG TTT<br>CCT CGC ACT         |
| hsa-miR-136   | GC GAA TTC ATG AGC TCT TCC<br>ATT TCC TGG AGT | GA GGA TCC TCT GCT CTG ATT<br>AGT TGG GCA         |
| hsa-miR-222   | GC GAA TTC ATG GAA AAT ATG<br>TGG CAC TTT ATT | GA GGA TCC CTT AAC ACC CTA<br>GAA CTT GAC         |
| hsa-miR-320d1 | GC GAA TTC ATG CCT TCA AAT<br>GAC AAA ACA CAC | GA GGA TCC TTC CTT TCC TAT<br>TTC TTT CCT         |
| hsa-miR-484   | GC GAA TTC ATG AAA ACC GAC<br>GCC CTT CTC TCC | GA GGA TCC GTC CAC GTC ACG<br>AGC TCA TTC         |
